# Supplementary material for: Dynamics of the Immune Response in Acute Hepatitis B Infection
Source: PubMed Central journal article supplement — Open Forum Infect Dis. 2017 Dec 20;4(4):ofx231. doi: 10.1093/ofid/ofx231 (PMC5739046; doi:10.1093/ofid/ofx231), 2017-12-20
Supplement: ofx231_suppl_supplementary_data.pdf [file ofx231_suppl_supplementary_data.pdf]

## **Dynamics of the immune response in acute hepatitis B infection**

Femke Stelma, Robin Erken, Sophie B. Willemse, Annikki de Niet, Marjan J. Sinnige, Karel van Dort, Hans L.

Zaaijer, Ester M.M. van Leeuwen, Neeltje A. Kootstra, Hendrik W. Reesink

**A**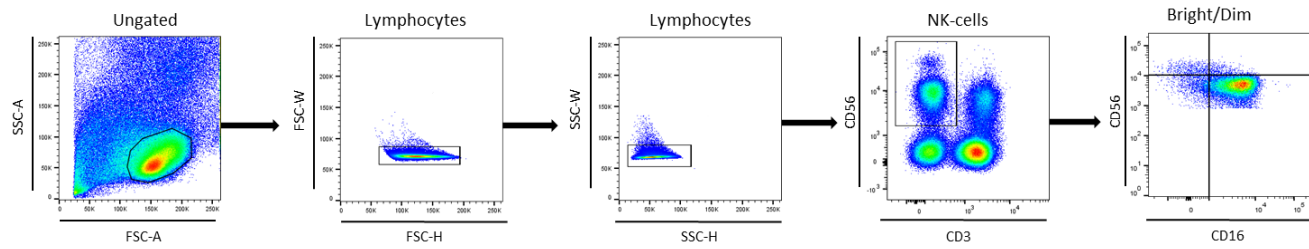**B**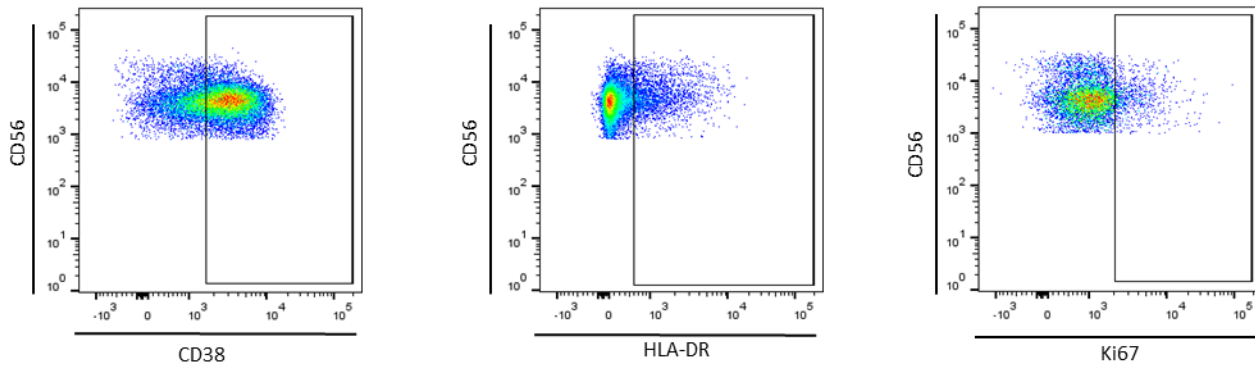**C**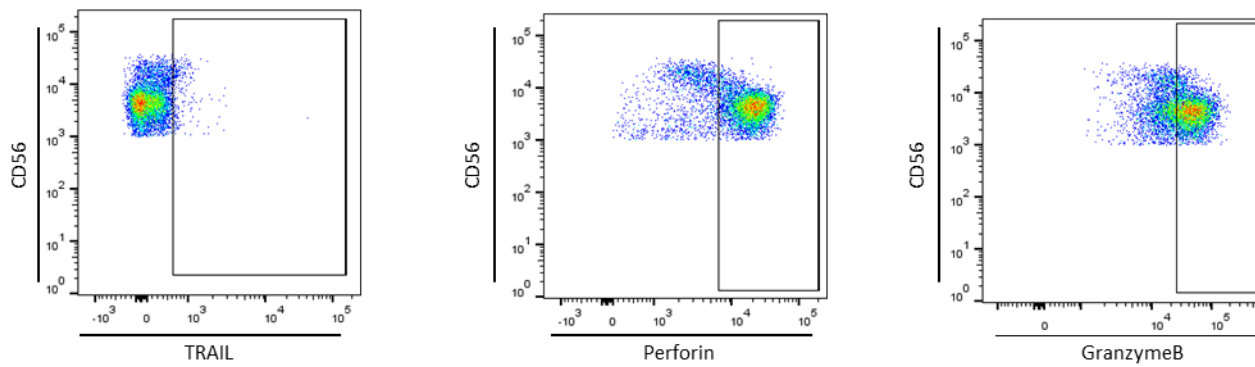**E**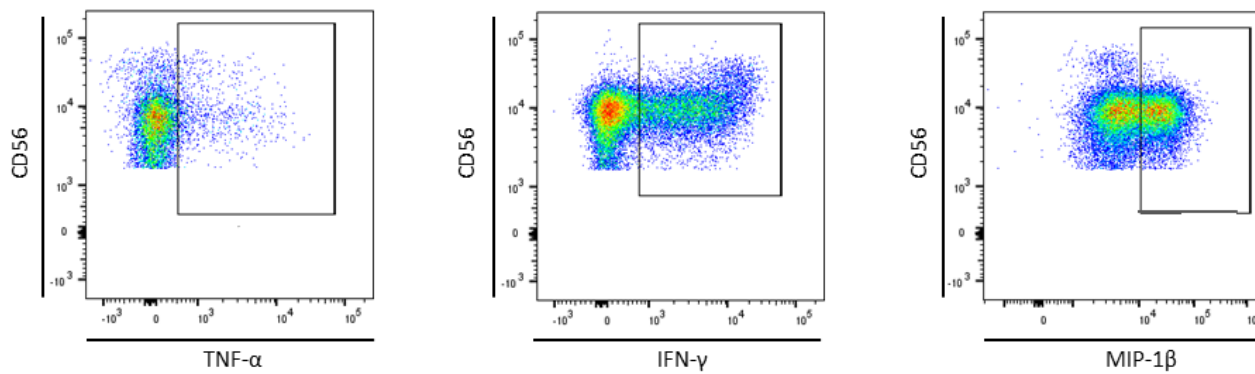

**Supplementary figure 1. Gating strategies used to analyse phenotype and function of NK cells.** Gating as displayed was used for both CD56<sup>dim</sup> NK cells and CD56<sup>bright</sup> NK cells. FSC, Forward-scatter; SSC, side-scatter.

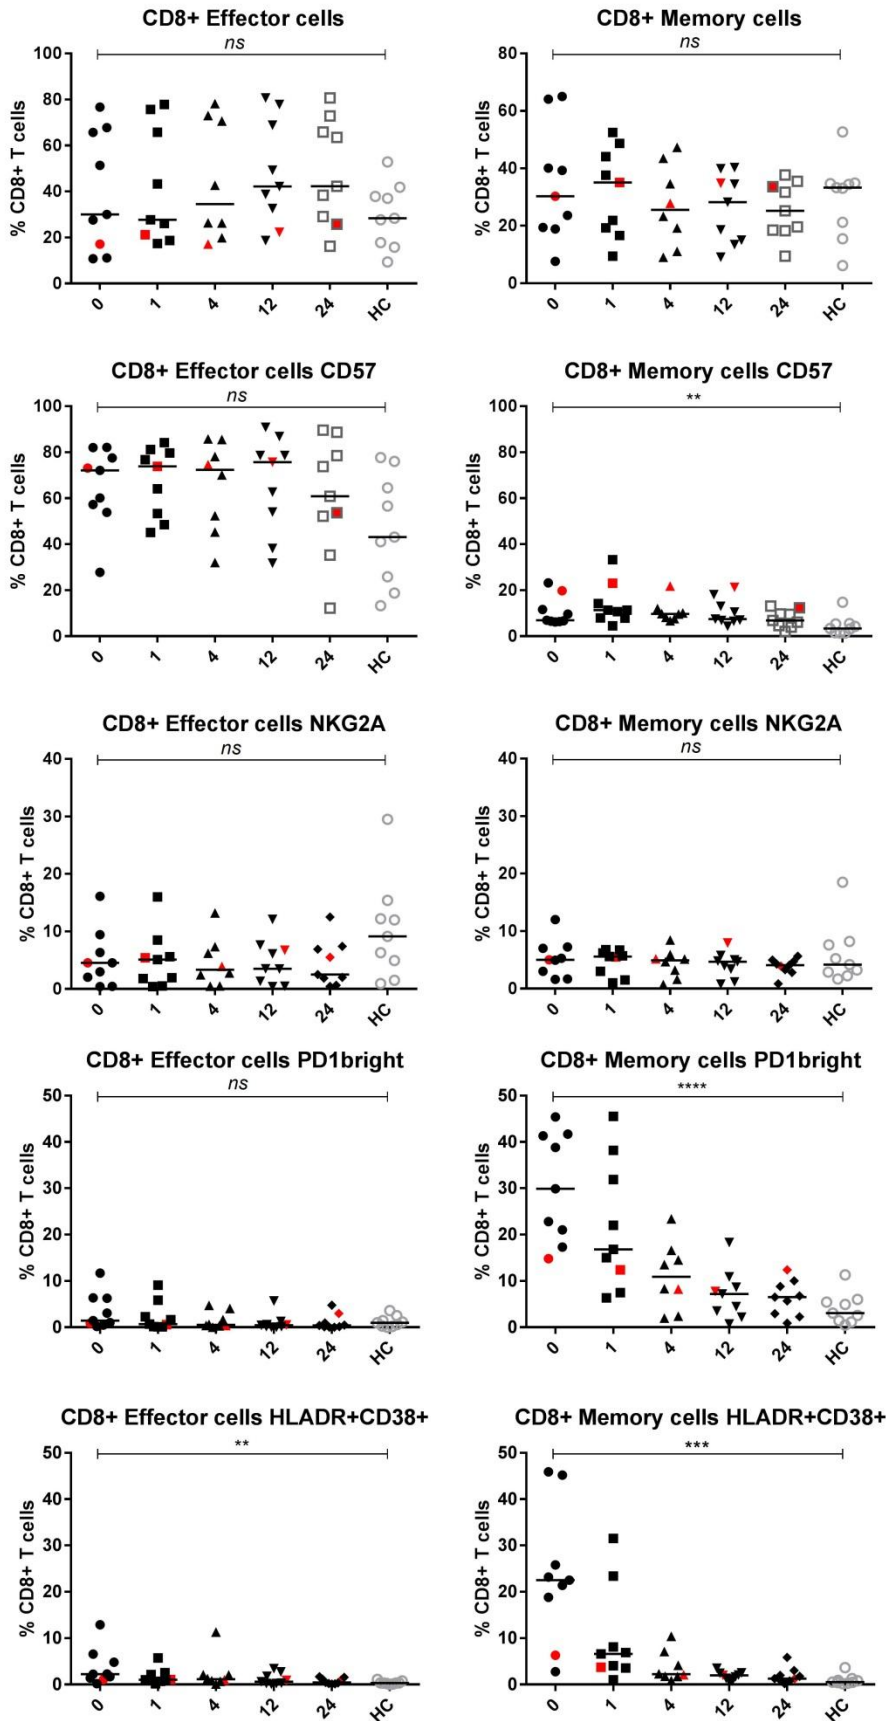

**Supplementary figure 2 (part I). Proportion of effector and memory CD8+ T cells expressing various markers.** NK cells from patients with acute HBV infection (n=9) as well as 9 healthy controls (HC) were analysed using immune phenotyping by flowcytometry. The Mann-Whitney U test was used to determine statistical significance. ns, non-significant; \*\*\*\*,  $p < 0.0001$ ; \*\*,  $p < 0.01$ .

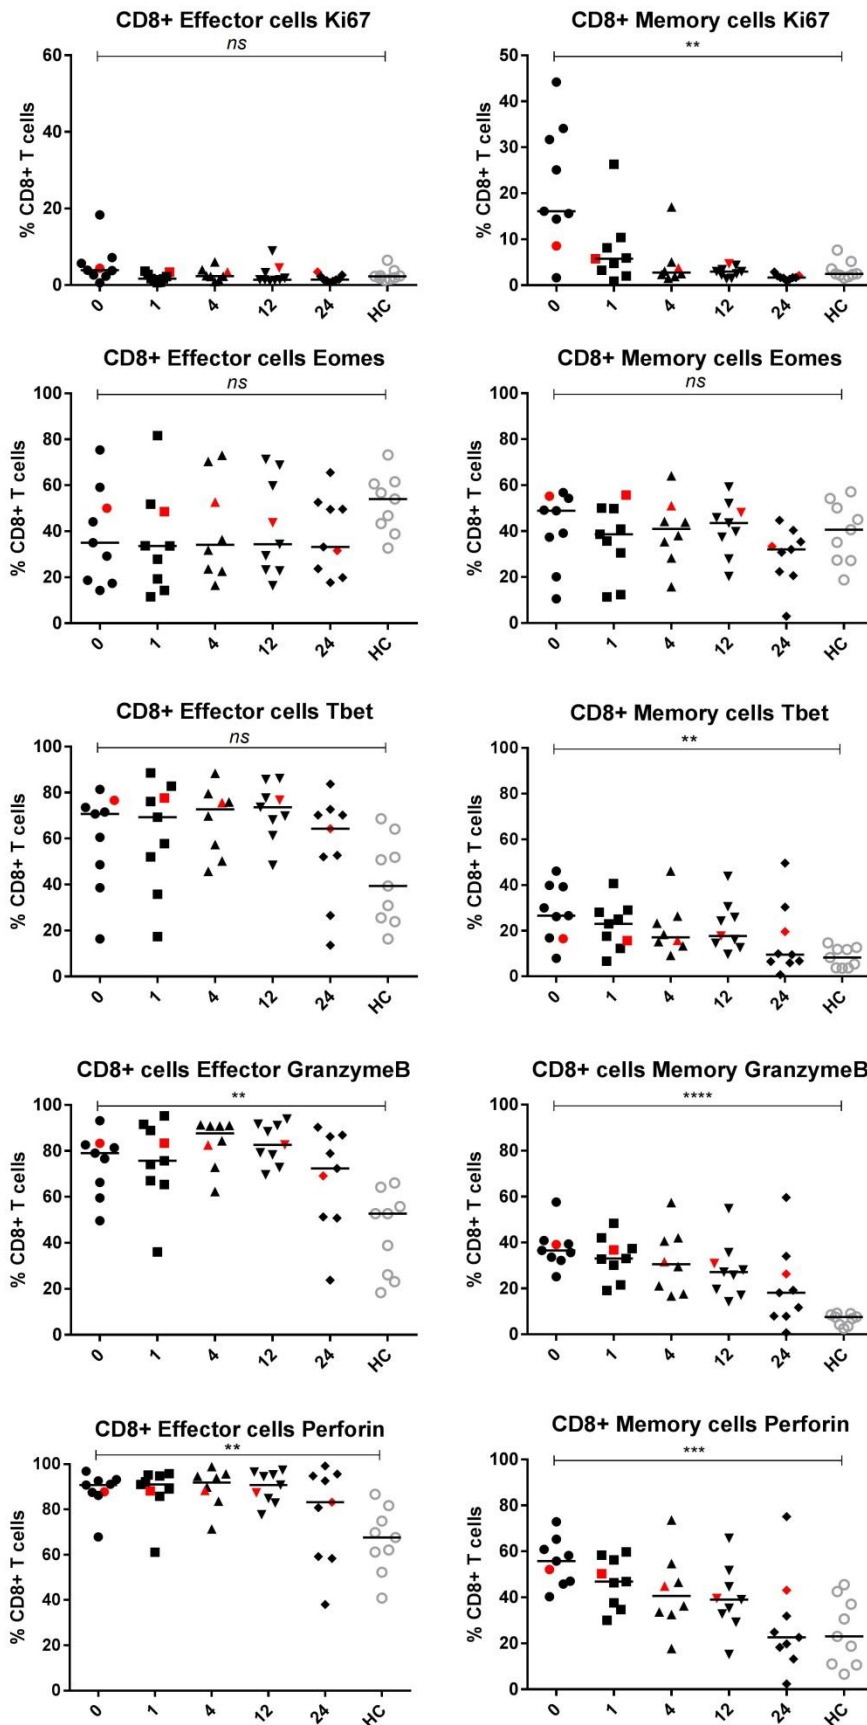

**Supplementary figure 2 (part II) Proportion of effector and memory CD8+ T cells expressing various markers** NK cells from patients with acute HBV infection (n=9) as well as 9 healthy controls (HC) were analysed using immune phenotyping by flowcytometry. The Mann-Whitney U test was used to determine statistical significance. ns, non-significant; \*\*\*\*,  $p < 0.0001$ ; \*\*\*,  $p < 0.001$ ; \*\*,  $p < 0.01$ .

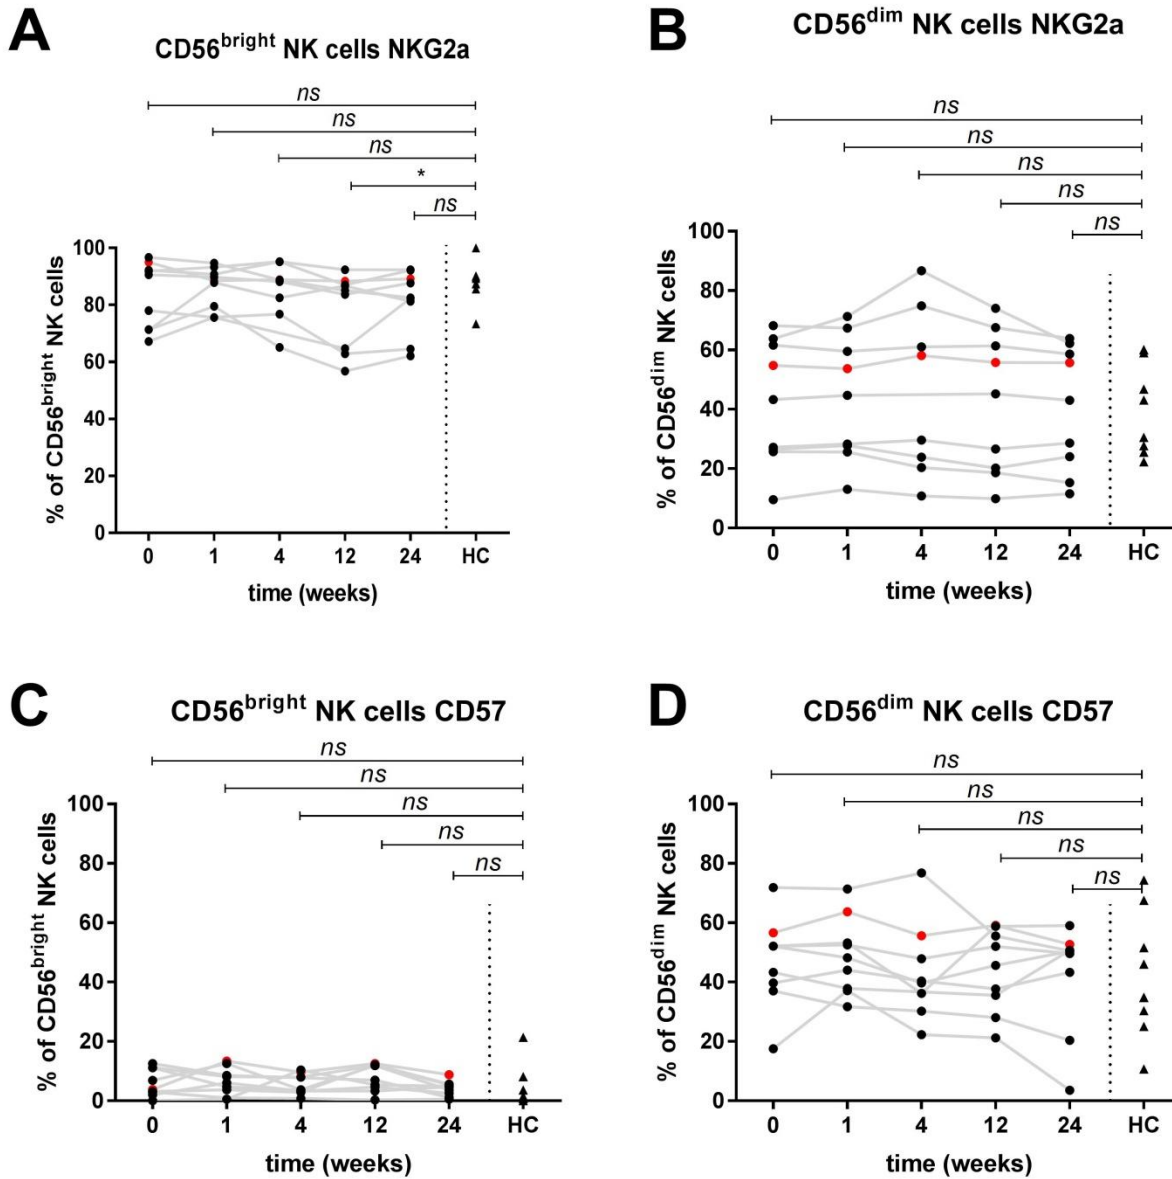

**Supplementary figure 3. Proportion of CD56<sup>bright</sup> and CD56<sup>dim</sup> NK cells expressing differentiation markers NKG2A (A,B) and CD57 (C,D) does not significantly change through the course of infection.** NK cells from patients with acute HBV infection (n=9) as well as 8 healthy controls (HC) were analysed using immune phenotyping by flowcytometry. The Mann-Whitney U test was used to determine statistical significance. ns, non-significant. peptide pools: X, x protein; C, core protein; E, envelope protein; PI, polymerase protein pool I; PII, polymerase protein pool II

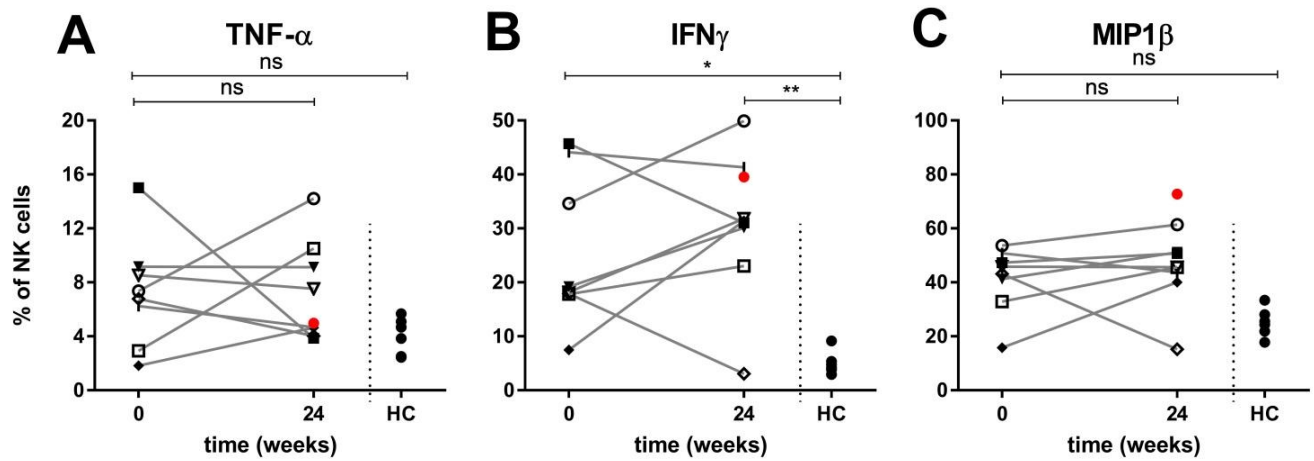

**Supplementary figure 4. Proportion of NK cells that produce IFN $\gamma$  is elevated in patients with AHB infection as compared to healthy controls (HC).** Cytokine production, after IL-12 and IL-15 stimulation, of NK cells from patients with acute HBV infection (n=9) as well as 6 healthy controls (HC) were analysed using immune phenotyping by flowcytometry. Mann-Whitney U test and Wilcoxon test were used to determine statistical significance. Healthy controls, HC; ns, non-significant; \*\*, p < 0.01. Patient 1 (□), patient 2 (|), patient 3 (●), patient 4 (■), patient 5 (◆), patient 6 (▼), patient 7 (▽), patient 8 (◇), patient 9 (○), and healthy controls (●).

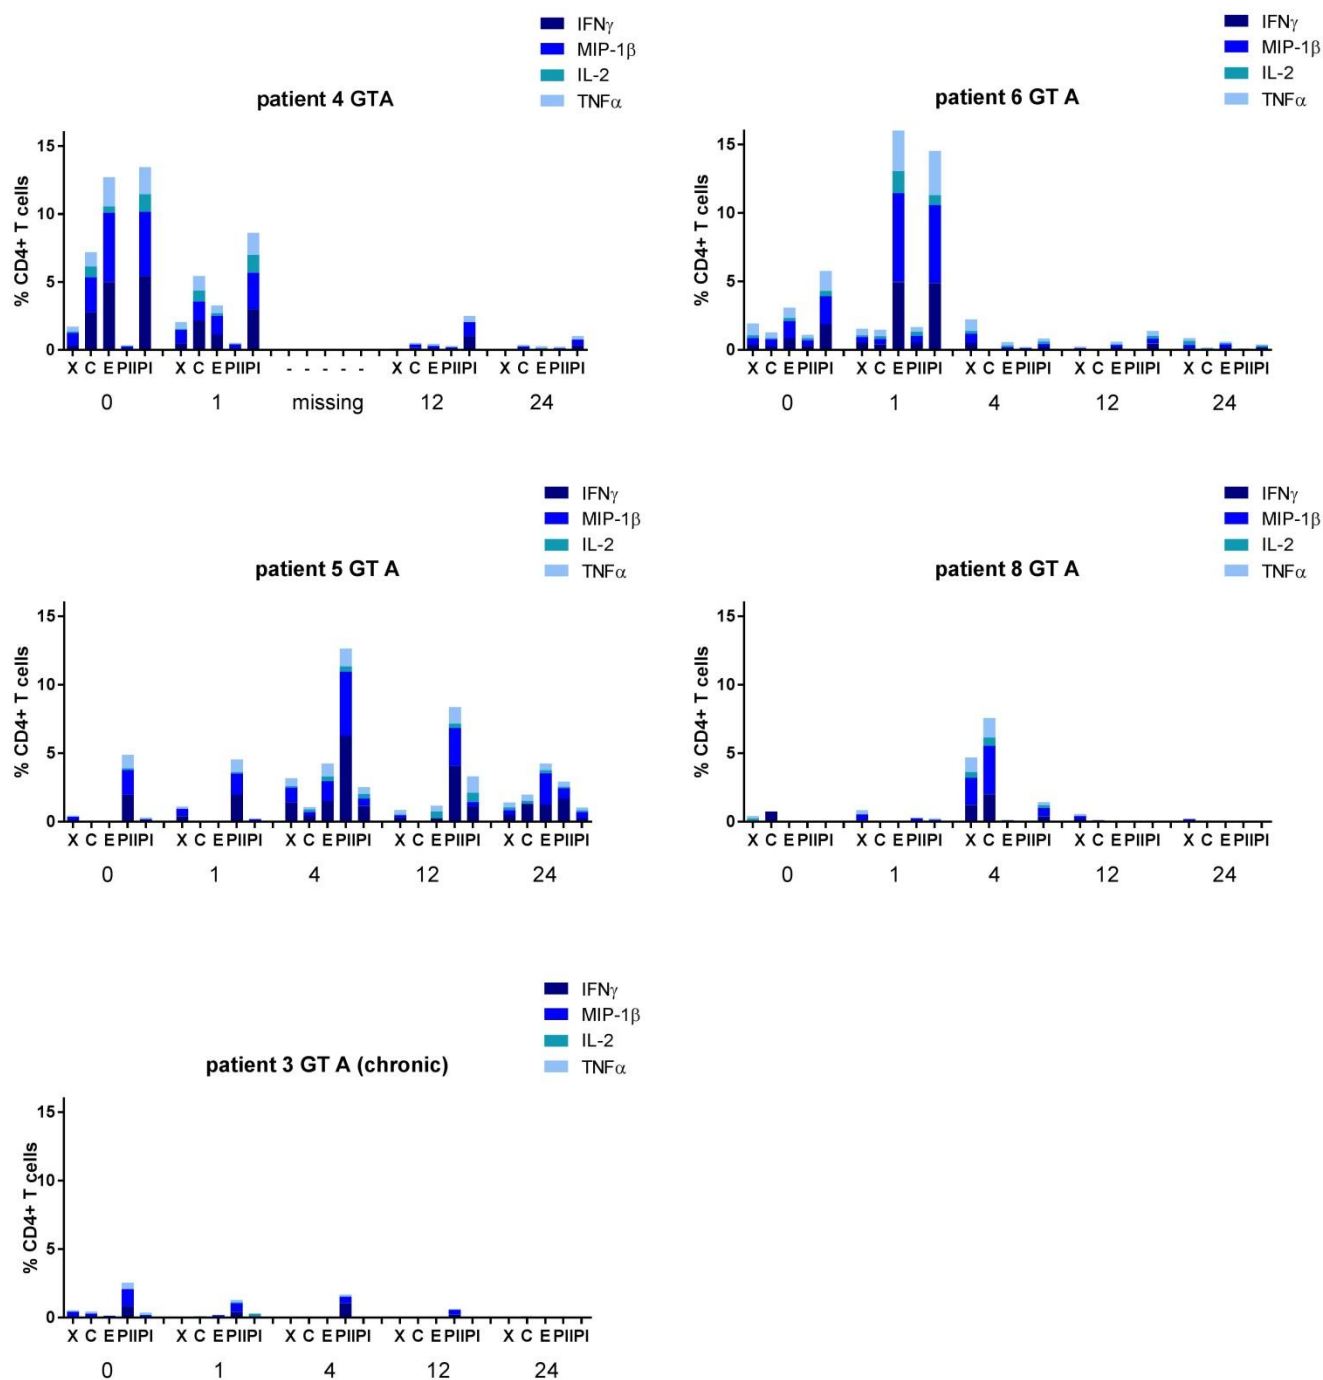

**Supplementary figure 5. CD4+ T cell responses to HBV genotype A peptides was lower in the patient that that did not clear the virus spontaneously compared to patients that did.** TNF $\alpha$ , IL-2, MIP-1 $\beta$  and IFN- $\gamma$  production by HBV-specific CD4+ T cells after stimulation with a HBV-peptide library in 4 patients who cleared AHB infection (A-D) and 1 patient who evolved to chronicity (E). Analysed using immune phenotyping by flowcytometry. Peptide pools: X, x protein; C, core protein; E, envelope protein; PI, polymerase protein pool I; PII, polymerase protein pool II.
